1  
2  
3  
4  
5  
6  
7  
8  
9  
10  
11  
12  
13  
14  
15  
16  
17  
18  
19  
20  
21  
22  
23  
24  
25  
26  
27  
28  
29  
30  
31  
32

**Diffusion MRI free water is a sensitive marker of age-related changes in the cingulum**

Manon Edde<sup>1,2\*</sup>, Guillaume Theaud<sup>6\*</sup>, François Rheault<sup>6</sup>, Bixente Dilharreguy<sup>2</sup>, Catherine Helmer<sup>4</sup>, Jean-François Dartigues<sup>4,5</sup>, Hélène Amieva<sup>4</sup>, Michèle Allard<sup>1,2,5</sup>, Maxime Descoteaux<sup>6†</sup>, Gwénaëlle Catheline<sup>1,2,3†</sup>

<sup>1</sup> EPHE, PSL, F-33000, Bordeaux, France

<sup>2</sup> CNRS, INCIA, UMR 5287, F-33000 Bordeaux, France

<sup>3</sup> Université de Bordeaux, INCIA, UMR 5287, F-33000 Bordeaux, France

<sup>4</sup> Université de Bordeaux, Inserm, Bordeaux Population Health Research Center, UMR 1219, F-33000 Bordeaux, France

<sup>5</sup> CHU de Bordeaux, Bordeaux, France

<sup>6</sup> Sherbrooke Connectivity Imaging Lab (SCIL), Université de Sherbrooke, Sherbrooke, QC, Canada

**Corresponding author:**

**Manon Edde**

Bât. 2A - 2ème étage - Case 22,

146 rue Léo Saignat,

33076 Bordeaux cedex

eddemanon@gmail.com

\*Co-authors. These authors have contributed equally.

† Co-senior authors. These senior authors have contributed equally.

**Running title:**

Free Water: a marker of age-related white matter changes

33  
34  
35  
36  
37  
38  
39  
40  
41  
42  
43  
44  
45  
46  
47  
48  
49  
50  
51  
52  
53  
54  
55  
56  
57  
58  
59  
60  
61  
62  
63  
64

**Abstract**

Diffusion MRI is extensively used to investigate changes in white matter microstructure. However, diffusion measures within white matter tissue can be affected by partial volume effects due to cerebrospinal fluid and white matter hyperintensities, especially in the aging brain. In previous aging studies, the cingulum bundle that plays a central role in the architecture of the brain networks supporting cognitive functions has been associated with cognitive deficits. However, most of these studies did not consider the partial volume effects on diffusion measures. The aim of this study was to evaluate the effect of free water elimination on diffusion measures of the cingulum in a group of 68 healthy elderly individuals. We first determined the effect of free water elimination on conventional DTI measures and then examined the effect of free water elimination on verbal fluency performance over 12 years. The cingulum bundle was reconstructed with a tractography pipeline including a white matter hyperintensities mask to limit the negative impact of hyperintensities on fiber tracking algorithms. We observed that free water elimination improved the sensitivity of conventional DTI measures to detect associations between tissue-specific diffusion measures of the cingulum and changes in verbal fluency in older individuals. Moreover, free water content measured along the cingulum was independently strongly associated with changes in verbal fluency. These observations suggest the importance of using free water elimination when studying brain aging and indicate that free water itself could be a relevant marker for age-related cingulum white matter modifications and cognitive decline.

**Keywords:** aging, tractography, free water, white matter hyperintensity, cingulum

65

## 66 **1. Introduction**

67           Aging is associated with widespread brain structural modifications including neurodegeneration of white  
68 and grey matter [1–3]. In the last few years, diffusion tensor imaging (DTI) has been widely used to indirectly  
69 explore microstructural properties of white matter and constitutes a sensitive technique to describe age-related  
70 white matter microstructural changes [4,5]. Parameters quantified by DTI such as Fractional Anisotropy (FA),  
71 Mean Diffusivity (MD) and Radial Diffusivity (RD) can be used to indirectly infer changes in axonal integrity and  
72 myelination [6]. In older adults, previous DTI studies reported a decrease in FA and an increase in MD and RD in  
73 major white matter tracts [6–8] that correlated with cognitive impairment [9–12].

74           However, diffusion measures within brain tissues can be affected by partial volume effects due to  
75 cerebrospinal fluid [13], especially in aging individuals with atrophied brains and ventriculomegaly [14–17]. When  
76 voxels contain cerebrospinal fluid (e.g. partial volume), diffusion measures can be biased towards a pattern of high  
77 diffusivity (MD, Axial Diffusivity (AD), RD) and reduced FA [18,19]. This effect has been particularly observed  
78 in the fornix and the corpus callosum because of their close proximity to periventricular regions [18,20,21]. To  
79 overcome this problem, the Free Water Elimination (FWE) method was used to differentiate the diffusion  
80 properties of brain tissues such as white matter bundles from the surrounding free water composed of cerebrospinal  
81 fluid [13,22]. Elimination of extracellular free water contamination improves the sensitivity and specificity of most  
82 measures derived from conventional DTI [16,22–24]. Although such correction has been used in pathological  
83 conditions [25–30], the majority of diffusion MRI studies do not consider free water effects of aging. Aging is  
84 associated with grey and white matter tissue loss, and the resulting enlargement of interstitial space could lead to  
85 increase in free water [31–34]. In addition, free water content in white matter fibers was recently associated with  
86 the presence of white matter hyperintensities (WMHs) in clinical studies [28,35–38]. In older adults, the prevalence  
87 and severity of WMH burden increases after age 60 [39,40]. Previous studies reported that the presence of WMH  
88 lesions was not only associated with age-related white matter changes evaluated with DTI (Maillard et al., 2014;  
89 Maniega et al., 2015; Pelletier et al., 2015) or tractography (Reginold et al., 2016, 2018; Svärd et al., 2017), but  
90 also with cognitive impairments mainly in memory and executive functions [5,46,47].

91           The cingulum bundle is one of the most studied white matter tracts running from the anterior to the  
92 posterior part of the brain that interconnects frontal, parietal, and temporal areas (Catheline et al., 2010; Jones et  
93 al., 2013; Bubb et al., 2018). Due to this central location, the cingulum plays a central role in white matter  
94 architecture and functional networks that support and contribute to optimal cognitive function (Bubb et al., 2018).  
95 In previous studies, changes within this bundle due to aging were correlated with executive and memory deficits  
96 (Catheline et al., 2010; Ezzati et al., 2016; Kantarci et al., 2011; Metzler-Baddeley et al., 2012; Seiler et al., 2018;

97 Sexton et al., 2010). However, these observations still remain controversial considering that most of these studies  
98 did not consider CSF partial effect due to atrophy or WMH burden. Recent tractography studies consistently  
99 observed that atrophy-related partial volume effects [16,18] and age-related ventricular enlargement [15] or WMH  
100 burden (Reginold et al., 2016) affect diffusion measures of the cingulum in healthy older individuals. In this regard,  
101 Reginold and colleagues reported higher RD in cingulum tracts that crossed WMH than those outside WMH  
102 regions (Reginold et al., 2016; see also Kurki & Heiskanen, 2018). Atrophy and WMH burden might therefore  
103 impact cingulum diffusion measures suggesting a source of significant bias in studies exploring the integrity of  
104 this bundle and its association with cognitive functions in aging.

105 In this study, we hypothesized that free water elimination would provide more accurate white matter  
106 diffusion measures of the cingulum, which in turn would be better correlated with verbal fluency changes in 68  
107 elderly individuals. To do so, the cingulum bundle was reconstructed with a tractography pipeline that includes a  
108 WMH mask to limit the negative impact of hyperintensities on fiber tracking algorithms. We first described the  
109 effect of FW-correction on diffusion measures of the cingulum derived from the conventional tensor DTI model.  
110 Then, we explored the association between FW-corrected diffusion measures and cognitive changes as evaluated  
111 using the Isaacs Set Test over 12 years. The Isaacs Set Test was chosen since it specifically assesses semantic  
112 memory and executive functioning.

113

114

115

## 116 **2. Methods**

117

### 118 2.1. Dataset

119 Participants were selected from the Bordeaux sample of the Three-City study [55], an ongoing longitudinal  
120 multicenter population-based elderly cohort designed to evaluate risk factors for dementia. The study protocol was  
121 approved by the ethics committee of Kremlin-Bicêtre University Hospital (Paris, France), and all participants  
122 provided written informed consent. At baseline, subjects were non-institutionalized, randomly recruited from  
123 electoral lists, and were older than 65 years. Since the 1999-2000 baseline inclusion, an extended  
124 neuropsychological assessment was administered by trained psychologists at each follow-up occurring at 2, 4, 7,  
125 10 and 12 years. An MRI scan was performed at the 10-year follow-up for every subject. All 239 subjects were  
126 screened, and individuals were excluded if they had dementia (n=8), brain pathologies (n=27) or if MRI images  
127 were either unavailable (n= 42), distorted by artefacts (n=24), or failed pre-processing (n=15). In addition,  
128 cingulum reconstruction failed in 16 subjects and tractography quality control revealed suboptimal data in 19

129 additional subjects. Out of the 239 initially screened subjects, 68 subjects were included in the study. All  
130 participants were right-handed and had a Mini Mental State Examination (MMSE) score greater than or equal to  
131 24.

132

### 133 2.2. Cognitive and clinical variables

134 The Isaacs Set Test (IST, Isaacs & Kennie, 1973) chosen for the study consists of a test on verbal fluency, where  
135 subjects are asked to cite the highest number of words in four semantics categories. Three scores of the IST were  
136 used, corresponding to the number of words cited by the subject at 15-seconds (IST 15s), 30-seconds (IST 30s)  
137 and 60-seconds (IST 60s). Verbal fluency was evaluated over 12 years, using a subject-specific slope for each IST  
138 score computed using a linear mixed model with time as a continuous variable, random intercept and slope. Over  
139 the 12-year follow-up period, the negative mean annual slope indicated a decrease in the number of given words.  
140 Some clinical variables were also collected: depressive symptoms evaluated using the Center for Epidemiologic  
141 Studies-Depression scale (CESD, Radloff, 1977), vascular risk factors including hypertension as defined in  
142 patients with a blood pressure > 140/90 mm Hg or taking anti-hypertensive medication, diabetes as defined in  
143 patients with a blood glycemic levels > 7 mmol/l or taking hypoglycemic medication, and body mass index (BMI).

144

### 145 2.3. MRI acquisition

146 MRI scanning was performed using a 3T Achieva system (Philips Medical Systems, The Netherlands) equipped  
147 with a 8-channel SENSE head coil. Head motions were minimized by using tightly padded clamps attached to the  
148 head coil. Anatomical MRI volumes were acquired using a 3D magnetization-prepared rapid gradient-echo  
149 (MPRAGE) T1-weighted sequence with the following parameters: repetition time (TR)/ echo time (TE) = 8.2  
150 ms/3.5 ms, flip angle 7°, field of view (FOV) 256x256 mm<sup>2</sup>, 180 slices of 1 mm of thickness, voxel size 1x1x1  
151 mm<sup>3</sup>. Fluid-attenuated inversion recovery (FLAIR) images were obtained with the following parameters:  
152 TR=11000 ms; TE=140 ms, inversion time = 2800 ms, 90-degree flip angle, FOV 230x172 mm<sup>2</sup>, 24 slices of 5  
153 mm of thickness, voxel size 0.72x1.20x5 mm<sup>3</sup>. Diffusion weighted images were acquired using a spin echo single  
154 shot EPI sequence composed of one b0 map (b-value=0 s/mm<sup>2</sup>) followed by 21 diffusion gradients maps (b-  
155 value=1000s/mm<sup>2</sup>) homogenously spread over a half sphere and 21 opposite directions spread over the opposite  
156 half sphere. To increase signal-to-noise ratio, a second series of two b0 and 42 DWI volumes was acquired. Sixty  
157 axial slices were acquired with the following parameters: TR= 9700 ms, TE= 60 ms, flip angle 90°, FOV 224x224  
158 mm<sup>2</sup>, 60 slices, no gap and voxel size 2x2x2 mm<sup>3</sup>. All acquisitions were aligned on the anterior commissure-  
159 posterior commissure plan.

160

161  
162  
163  
164  
165  
166  
167  
168  
169  
170  
171  
172  
173  
174  
175  
176  
177  
178  
179  
180  
181  
182  
183  
184  
185  
186  
187  
188  
189  
190  
191  
192

## 2.4. MRI preprocessing

### *2.4.1. Diffusion MRI preprocessing*

Diffusion MRI (dMRI) images were pre-processed using FMRIB's Diffusion toolbox [58,59] in order to produce individual FA, MD, AD and RD maps in native space. For each subject, dMRI images were co-registered to the b0 reference image with an affine transformation and were corrected for motion and eddy current distortions. Brain Extraction Tool (BET, Smith, 2002) was applied to eliminate non-brain voxels and resulting dMRI images were denoised using the non-local mean denoising method [61]. To increase signal-to-noise ratio, the two reversed phases were then combined into a dMRI image using FSL tools. Finally, the fiber Orientation Distribution Functions (fODF) map was computed using the spherical constrained deconvolution (Descoteaux et al., 2007; Tournier et al., 2007; Theaud et al., 2019). Visual quality check was performed and did not reveal any processing failure for the included subjects.

### *2.4.2. White Matter Hyperintensity segmentation*

White matter hyperintensity volumes were automatically segmented by the lesion growth algorithm implemented in the Lesion Segmentation Tool (LST, v2.0; Schmidt et al., 2012) of SPM12. For each participant, the T1-weighted image was used to generate partial volume estimation and three tissue probability maps (grey matter, white matter and cerebrospinal fluid). Then, each FLAIR image was co-registered on the corresponding T1 image to compute lesion belief maps for the three tissue classes. These maps were finally summed up and a lesion growth model with a pre-chosen initial threshold ( $\kappa = 0.3$ ) was applied to create lesion maps in native space. Visual inspection of the lesion probability maps was performed and manually corrected when inaccuracies were found. Finally, WMH volumes were extracted, normalized by white matter volume and log transformed (total WMH). The volume of WMH within the cingulum was estimated by crossing the WMH mask with the cingulum bundle (cingulum WMH).

### *2.4.3. Free Water Elimination*

Free Water Elimination (FWE, Pasternak et al., 2009) was used to estimate and remove the free water components from diffusion images. To isolate the fractional volume of freely diffusing extracellular water molecules from tissue compartments (i.e. reflecting intracellular processes), FWE fits a bi-tensor model within each voxel: a first one models free water diffusion, defining as an isotropic diffusion, and a second one models the tissue compartment [24]. The isotropic compartment models extracellular water which is characterized by freely and not hindered diffusion. A fixed diffusivity of  $3.10^{-3} \text{ mm}^2/\text{s}$  (i.e. diffusion coefficient of water at body temperature) is

193 used for this compartment. The fraction of free water content per voxel provided a native free water (FW) map for  
194 each subject and varied between 0 to 1. In contrast, the tissue compartment models water molecules close to cellular  
195 membranes of brain tissue, which are defined by restricted or hindered diffusion using a diffusion tensor. Thereby,  
196 the volume of freely diffusing extracellular water molecules is removed from tissue compartments. Consequently,  
197 the FW-corrected measures were expected to be more sensitive and specific to tissue changes than the measures  
198 derived from the single tensor model [23,27,29]. The FW-corrected DTI maps were called FA tissue (FAt), RDt,  
199 ADt and MDt (Chad et al., 2018).

200

#### 201 *2.4.4. Cingulum tractography and measures*

202 For each participant, a local tracking using probabilistic algorithm based on fODF maps was performed. The  
203 tractography was performed using twenty tracking seeds per voxels included in the white matter mask. The seeding  
204 and tracking masks were modified to include WMH masks (see supplementary material). Next, the left and right  
205 cingulum bundles were extracted using the RecoBundles approach (Garyfallidis et al., 2018, Figure 1).  
206 RecoBundles is a model-based algorithm performing a registration of a Cingulum model on each subject to extract  
207 the subject specific cingulum tract from the whole tractogram. Five different Cingulum models were used in this  
208 study (RecoBundles). Finally, after visual inspection of cingulum bundles using dmriqc tool  
209 (<https://github.com/GuillaumeTh/dmriqcpy>), 13 subjects were excluded due to the absence of right or left  
210 cingulum bundles and 6 subjects were excluded because of miss-segmentation of hippocampal and anterior parts  
211 of the cingulum bundle, mainly because of the age range of our population (older than 85 years of age) at the time  
212 of MRI sessions. Therefore, the cingulum bundle was considered as a whole bundle and the different subdivisions  
213 of the cingulum were not investigated in this study.

214 Cingulum diffusion measures were extracted before (FA, MD, RD and AD) and after FW-correction (FAt, MDt,  
215 RDt and ADt). The diffusion measures without free water correction are defined as conventional DTI measures  
216 and reflect the weighted average of all compartments including free water, whereas diffusion measures after  
217 correction of free water are defined as FW-corrected measures. Measures of the left and right cingulum were  
218 averaged for the analysis.

219 A percentage of measure changes (% change) for each participant was determined by computing the difference  
220 between the measure before and after FW-correction divided by the measure before FW-correction [*i.e.* %  
221 change = ((FW-corrected measure – DTI measure)/DTI measure) × 100].

222

223 **Figure 1.** Left and right cingulum templates used to extract the cingulum tract for each participant (A); Example  
224 of the cingulum bundle obtained for one subject displayed on the corresponding T1-weighted image (B). Along  
225 the fibers, color represents the RGB scale.

226

## 227 2.5. Statistical analysis

228 Because of non-normality of the continuous and categorical variables, Mann-Whitney U-tests and  
229 Spearman's correlations were used to evaluate the associations between cingulum diffusion measures as well as  
230 verbal fluency with continuous variables (age, global cognition score, depressive symptoms score, body mass  
231 index and WMH volume) and categorical variables (gender, education level, presence/absence of diabetes, of  
232 hypertension) respectively. To compare the effects of FW-correction to conventional DTI on cingulum diffusion  
233 measures, a Paired t-Test was performed. Linear regression models were then computed to describe the extent to  
234 which the FW-correction affects the association between cingulum diffusion measures and changes in verbal  
235 fluency. Diffusion measures were included as independent variables (conventional and FW-corrected FA, MD,  
236 AD and RD in separate models) and the verbal fluency slope set as the dependent variable in model adjusted for  
237 age and WM volume of the cingulum. Similar additional linear regression models were performed to examine the  
238 relationship between free water content and changes in verbal fluency. Total WMH volume was added in previous  
239 models to evaluate to the extent to which WMH burden affects the observed associations. In a supplementary  
240 analysis, specific WMH burden of the cingulum bundle was added to the models (see S1 Table 3).

241 A false discovery rate (FDR) multiple-comparison correction method was systematically applied for each  
242 analysis. Results were considered significant for  $p < 0.05$ , FDR corrected [67]. All statistical analyses were  
243 performed using IBM SPSS Statistics v.23 software (IBM Corporation, Armonk, NY, USA).

244

## 245 **3. Results**

### 246 3.1. Sample characteristics

247 Characteristics of participants are presented in Table 1. Significant age effects on verbal fluency changes were  
248 observed for all IST scores (IST 15s,  $r = -0.212$ ,  $p = 0.022$ ; IST 30s,  $r = -0.207$ ,  $p = 0.038$  and IST 60s,  $r = -0.252$ ,  
249  $p = 0.019$ ). WMH volumes correlated with age (total WMH:  $r = 0.447$ ,  $p < 0.001$ ; cingulum WMH:  $r = 0.201$ ,  $p = 0.038$ )  
250 and changes in verbal fluency scores ( $r = -0.218$ ,  $p = 0.038$ ;  $r = -0.293$ ,  $p = 0.016$  and  $r = -0.328$   $p = 0.008$  respectively).  
251 None of clinical variables were related to age, verbal fluency or WMH volumes ( $p > 0.05$ ). Finally, no association  
252 was observed between demographic or clinical variables and cingulum diffusion measures (see S1 Table 1).

253

254 **Table 1.** Characteristics of participants, 12-year verbal fluency decline and volumetric variables



| <b>Sample n=68</b>                |                |
|-----------------------------------|----------------|
| <i>Sociodemographic variables</i> | Mean ± SD or % |
| Age                               | 81.2 ± 0.48    |
| Male gender                       | 36.8%          |
| High level of education           | 37%            |
| <i>Clinical variables</i>         |                |
| MMSE                              | 27.3 ± 0.3     |
| CES-D                             | 8.3 ± 0.9      |
| BMI (kg/m <sup>2</sup> )          | 25.2 ± 0.5     |
| Diabetes                          | 10.3%          |
| Hypertension                      | 35.3 %         |
| <i>Verbal fluency decline</i>     |                |
| IST at 15 seconds                 | -0.489 ± 0.02  |
| IST at 30 seconds                 | -0.697 ± 0.04  |
| IST at 60 seconds                 | -0.924 ± 0.06  |
| <i>Volumetric variables</i>       |                |
| Total WMH volume ml               | 15.9 ± 4.1     |
| Cingulum bundle volume (% TIV)    | 0.46 ± 0.06    |
| Cingulum WMH volume (%)           | 3.2 ± 0.65     |

MMSE, Mini Mental State Examination; BMI, Body Mass Index; CES-D, Center for Epidemiologic Studies-Depression scale; IST, Isaacs Set Test; WMH, White Matter Hyperintensity.

255

256 3.2. Effect of FW-correction on conventional DTI parameters

257 Cingulum diffusion measures are presented in Table 2. All FW-corrected measures were significantly different  
 258 from their conventional counterparts (paired t-test,  $p < 0.05$  FDR-corrected, Table 2 and Fig 2). After FW-  
 259 correction, a mean increase of 1.52 % of FA<sub>t</sub> and a mean decrease of 1.61 % of MD<sub>t</sub>, 2.5% of RD<sub>t</sub> and 1.08% of  
 260 AD<sub>t</sub> were observed.

261 **Table 2.** Cingulum diffusion measures before (conventional DTI) and after FW-correction and % of change  
 262 between both measures for each group

| <b>Cingulum diffusion measures</b>       |                         |                                  |          |              |                              |
|------------------------------------------|-------------------------|----------------------------------|----------|--------------|------------------------------|
|                                          | <b>DTI</b><br>mean ± SD | <b>FW-corrected</b><br>mean ± SD | <b>t</b> | <b>p-FDR</b> | <b>% Change</b><br>mean ± SD |
| FA                                       | 0.543 ± 0.049           | 0.567 ± 0.054                    | -3.367   | 0.019*       | 1.52 ± 0.50                  |
| MD (10 <sup>-3</sup> mm <sup>2</sup> /s) | 0.768 ± 0.0041          | 0.755 ± 0.0034                   | -3.196   | 0.024*       | -1.61 ± 0.22                 |
| RD (10 <sup>-3</sup> mm <sup>2</sup> /s) | 0.506 ± 0.0047          | 0.493 ± 0.0049                   | -5.315   | 0.010*       | -2.50 ± 0.19                 |
| AD (10 <sup>-3</sup> mm <sup>2</sup> /s) | 1.29 ± 0.0683           | 1.27 ± 0.0638                    | -2.975   | 0.044*       | -1.08 ± 0.34                 |
| FW                                       | -                       | 0.141 ± 0.017                    |          |              |                              |

\*  $p < 0.05$  FDR corrected,

Paired Student's t-test

263 **Figure 2.** Boxplot charts of the difference in cingulum diffusion measures before (light grey) and after (dark grey)  
 264 FW-correction for (a) fractional anisotropy, (b) mean diffusivity, (c) radial diffusivity, (d) axial diffusivity. The  
 265 blue line represents a decrease and the red line represents an increase.

266

267 3.3. Effect of FW-correction on relationships between cingulum diffusion measures and verbal fluency

268 3.3.1. Associations with DTI conventional measures

269 A lower MD value was related to IST decline at 15 and 30 seconds in a model adjusted for age and white matter  
 270 volume of the cingulum ( $p < 0.05$  FDR-corrected, Table 3). No association was observed with FA, RD and AD.

271

272 **Table 3.** Correlations between cingulum diffusion measures and verbal fluency score (IST) before (conventional  
 273 DTI) and after FW-correction

|                                             |    | DTI            |             |                |             |         |       |
|---------------------------------------------|----|----------------|-------------|----------------|-------------|---------|-------|
|                                             |    | IST 15s        |             | IST 30s        |             | IST 60s |       |
|                                             |    | $\beta$        | $R^2$       | $\beta$        | $R^2$       | $\beta$ | $R^2$ |
| Model unadjusted for total WMH <sup>a</sup> | FA | 0.015          | 0.001       | 0.047          | 0.002       | 0.067   | 0.004 |
|                                             | MD | <b>-0.431*</b> | <b>0.17</b> | <b>-0.335*</b> | <b>0.12</b> | -0.174  | 0.07  |
|                                             | AD | -0.186         | 0.036       | -0.135         | 0.018       | -0.060  | 0.004 |
|                                             | RD | -0.114         | 0.013       | -0.128         | 0.016       | -0.129  | 0.017 |
| -----                                       |    |                |             |                |             |         |       |
| Model adjusted for total WMH <sup>b</sup>   | FA | 0.022          | 0.023       | 0.040          | 0.052       | 0.069   | 0.067 |
|                                             | MD | -0.267         | 0.020       | -0.218         | 0.010       | -0.147  | 0.09  |
|                                             | AD | -0.172         | 0.054       | -0.109         | 0.062       | -0.029  | 0.062 |
|                                             | RD | -0.119         | 0.036       | -0.110         | 0.062       | -0.121  | 0.075 |

  

|                                             |     | FW-corrected   |             |                |             |         |       |
|---------------------------------------------|-----|----------------|-------------|----------------|-------------|---------|-------|
|                                             |     | IST 15s        |             | IST 30s        |             | IST 60s |       |
|                                             |     | $\beta$        | $R^2$       | $\beta$        | $R^2$       | $\beta$ | $R^2$ |
| Model unadjusted for total WMH <sup>a</sup> | FAt | 0.047          | 0.003       | 0.098          | 0.01        | 0.095   | 0.009 |
|                                             | MDt | <b>-0.443*</b> | <b>0.19</b> | <b>-0.361*</b> | <b>0.13</b> | -0.226  | 0.08  |
|                                             | ADt | -0.198         | 0.04        | -0.134         | 0.018       | -0.061  | 0.004 |
|                                             | RDt | <b>-0.293*</b> | <b>0.11</b> | <b>-0.248*</b> | <b>0.13</b> | -0.199  | 0.039 |
|                                             | FW  | <b>-0.353*</b> | <b>0.12</b> | <b>-0.241*</b> | <b>0.10</b> | -0.196  | 0.061 |
| -----                                       |     |                |             |                |             |         |       |
| Model adjusted for total WMH <sup>b</sup>   | FAt | 0.035          | 0.044       | 0.072          | 0.061       | 0.071   | 0.07  |
|                                             | MDt | <b>-0.401*</b> | <b>0.20</b> | <b>-0.341*</b> | <b>0.17</b> | -0.189  | 0.11  |
|                                             | ADt | -0.067         | 0.10        | -0.185         | 0.10        | -0.097  | 0.08  |
|                                             | RDt | -0.224         | 0.11        | -0.213         | 0.11        | -0.173  | 0.09  |
|                                             | FW  | <b>-0.333*</b> | <b>0.15</b> | <b>-0.275*</b> | <b>0.14</b> | -0.213  | 0.10  |

274 <sup>a</sup>  $\beta$ , standardized coefficient regression adjusted for age and cingulum white matter volume

275 <sup>b</sup>  $\beta$ , standardized coefficient regression adjusted for age, cingulum white matter volume and total WMH volume

276  $R^2$ , R square value

277 \*  $p < 0.05$  FDR corrected

278 3.3.2. *Associations with FW-corrected measures*

279 After FW-correction, high values of MDt and RDt were strongly associated with IST decline at 15 and 30 seconds  
280 in a model adjusted for age and white matter volume of the cingulum ( $p < 0.05$ , Table 3). No association was  
281 observed with FAt and ADt.

282

283 3.3.3. *Association with cingulum free water content*

284 High free water content was associated with changes in IST score at 15 and 30 seconds in a model adjusted for  
285 age and white matter volume of the cingulum ( $p < 0.05$  FDR-corrected, Table 3).

286

287 3.4. *Impact of WMH burden on the association between cingulum diffusion measures and verbal fluency*

288 In regression models adjusted for total WMH burden, correlations between conventional DTI measures (MD) and  
289 IST decline were not significant anymore. In contrast, MDt and free water content correlations were preserved  
290 when total WMH volume (Table 3) as well as WMH volume within the cingulum (see S1 Table 3) were added as  
291 covariate in regression models ( $p < 0.05$  FDR-corrected, Table 3). In a global model, both diffusion measures  
292 remained significantly associated with IST at 15 (FW:  $\beta = -0.262$  and MDt:  $\beta = -0.310$ ) and 30 seconds (FW:  $\beta =$   
293  $-0.216$  and MDt:  $\beta = -0.249$ ,  $p < 0.05$ ) when adjusted for total WMH volume, indicating that both free water  
294 content and MDt independently contributed to the cognitive variances.

295

296 **4. Discussion**

297 In this study, we examined, over a 12-year period, the effect of free water elimination on conventional DTI  
298 measures of white matter within the cingulum tract and the effect of such correction on verbal fluency changes in  
299 elderly subjects. In a group of 68 older participants, FW-correction significantly impacted all conventional DTI  
300 measures and measure following such correction correlated with decline in verbal fluency performances at 15 and  
301 30 seconds. In addition, free water content was also associated with changes in verbal fluency. Finally, in models  
302 adjusted for WMH volumes, correlations between MDt and free water content were preserved.

303

304 4.1. Free water elimination effect

305 In accordance with recent findings in young adults [22], older adults (Chad et al., 2018) and clinical  
306 studies [28,68], FW-correction was associated with an increase in FA, and a decrease in diffusivity measures (MD,  
307 RD and AD). These changes in DTI measures after elimination of the free water compartment suggested not only  
308 a non-null volume of the extracellular water [6,13,28,69], but also indicate that white matter microstructural

309 changes were less pronounced than previously suggested by conventional DTI measures (Bennett & Madden,  
310 2014; Bennett et al., 2017; Lockhart & DeCarli, 2014; Pelletier et al., 2015).

311 Based on conventional DTI, our study revealed that only MD showed significant correlations with  
312 changes in verbal fluency, especially at 15 and 30 seconds. The elimination of the free water content confirmed  
313 such strong association for MDt and revealed additional correlations for RDt that could not be fully observed  
314 without considering the free water content. The observed association is in line with previous studies reporting the  
315 role of the cingulum bundle in executive functioning in older adults [50,53,73–76]. Even if the underlying  
316 neurobiological properties of these parameters remain controversial, a high RDt, without any changes in ADt, has  
317 been described as predominantly reflecting myelin changes in animal studies (Song et al., 2003; Sun et al., 2005)  
318 and demyelination severity in human post mortem studies on multiple sclerosis (Klawiter et al., 2011; Schmierer  
319 et al., 2008). This suggests that changes in verbal fluency in our population might be related to myelin changes  
320 within the cingulum, rather than axonal damage (Madden et al., 2012; M. W. Vernooij et al., 2008; Burzynska et  
321 al., 2010). Therefore, our results support previous studies reporting that the elimination of free water improves the  
322 estimation of tissue-specific indices which were more strongly predictive of cognitive changes than conventional  
323 DTI-derived parameters [6,23,26,38,69,77].

324

#### 325 4.2. Free water content

326 In our group of elderly participants, a non-null value of free water content was observed, suggesting that  
327 despite its distance from the ventricles, some free water is likely present in the extracellular space of the cingulum.  
328 This is consistent with recent studies on whole brain white matter reporting a fraction of free water in the elderly  
329 (Albi et al., 2017; Chad et al., 2018; Papadaki et al., 2019). In addition, no association between the free water  
330 content within the cingulum and CSF volumes was observed in our participants (data not shown). However, we  
331 observed that a high content of free water was related to a low cingulum volume, suggesting that in our population  
332 the high free water content may be due to atrophy-related processes rather than CSF contamination (Oestreich et  
333 al., 2016; Wang et al., 2011). In line with previous older adults and clinical studies, we reported that a high content  
334 of free water within the cingulum was strongly associated with changes in verbal fluency performances at 15 and  
335 30 seconds (Bergamino et al., 2017; Ji et al., 2017, 2019; Maillard et al., 2017, 2019). In this regard, in a recent  
336 longitudinal study on 224 elderly subjects, Maillard and colleagues showed that an increase in free water was not  
337 only associated with reduced performances in executive function assessments but was the strongest predictor of  
338 cognitive decline. Taken together, these results support the idea that beyond the elimination of CSF contamination,  
339 free water could provide additional structural information that could constitute a physiological index reflecting  
340 tissue changes in white matter [27,69,79]. However, the underlying microcellular events accounting for the

341 observed free water content are far from being fully understood; its increase could be related to different  
342 pathophysiological processes such as a microvascular degeneration [28,37,80], a reduction in myelin content  
343 (Oestreich et al., 2016; Papadaki et al., 2019) or a modulation in the permeability of the blood-brain barrier  
344 (Maillard et al., 2017).

345

#### 346 4.3. White matter hyperintensities burden effect

347 The present study showed that when adjusting for WMH volumes, the associations between MDt and free  
348 water content and verbal fluency performances at 15 and 30 seconds remained significant, suggesting that both  
349 could contribute independently to cognitive impairment in aging. In accordance with these results, recent  
350 tractography studies reported that cingulum tracts crossing WMH exhibited significant changes in diffusion  
351 measures (Reginold et al., 2016), and suggested that these modifications could extend beyond the WMH lesions  
352 (Maillard et al., 2014; Promjunyakul et al., 2016; Reginold et al., 2018). Previous DTI studies also reported that  
353 WMH were associated with higher diffusion measures in the normal-appearing white matter [41,43,46,81–83].  
354 Taken together, these results suggest that small focal WMH may lead to both local and distant effects that are large  
355 enough to impact white matter diffusion properties of the cingulum tract.

356 Some methodological limitations should be taken into account when interpreting our findings. First, this  
357 study was based on a moderate sample size of healthy elderly participants. However, our population exhibited  
358 sufficient inter-individual variability in structural measures and cognitive performances to detect associations  
359 between these parameters. Second, the cingulum was analyzed as a single entity despite the fact that it consists of  
360 a complex structure containing not only long association fibers, but also short tracts connecting adjacent cortices  
361 [84–86]. Finally, the current study was based on diffusion MRI data that was acquired with a single b-value. The  
362 algorithm used to fit the free water imaging model involved spatial regularization of data which decreases intra-  
363 group variability (Pasternak et al., 2009), and may hide subtle spatial features. Even though comparable results  
364 using single- and multi-shell acquisitions have been previously reported [87], advanced acquisitions that include  
365 multiple b-values could further increase the accuracy of the free water model [69,87].

366

367 To conclude, we reported that FW-correction improves the sensitivity to detect associations between tissue specific  
368 diffusion measures of the cingulum and changes in verbal fluency in elderly individuals. Moreover, free water  
369 content *per se* appears to be a relevant parameter to describe age-related modifications of the white matter and its  
370 association with executive functioning. These observations suggest the importance of considering the free water  
371 compartment for DTI measures in aging.

372

### 373 **Funding**

374 This research was funded by the FONDATION VAINCRE ALZHEIMER (#14733, [www.vaincrealzheimer.org](http://www.vaincrealzheimer.org)).

375 This study was considered an emerging project and therefore partly funded as part of the laboratory of Excellence

376 TRAIL ANR-10-LABX-57 ([trail.labex.u-bordeaux.fr](http://trail.labex.u-bordeaux.fr)). The Three-City study is conducted under a partnership

377 agreement between the Institut National de la Santé et de la Recherche Médicale (INSERM, [www.inserm.fr](http://www.inserm.fr)), the

378 University Bordeaux 2 Victor Segalen ([www.u-bordeaux.fr/](http://www.u-bordeaux.fr/)) and Sanofi-Aventis ([www.sanofi.fr/](http://www.sanofi.fr/)). The Fondation

379 pour la Recherche Médicale funded the planning and initiation of the study ([www.frm.org/](http://www.frm.org/)). The Three-City study

380 is also supported by the Caisse Nationale Maladie des Travailleurs Salariés ([www.ameli.fr/](http://www.ameli.fr/)), Direction Générale

381 de la Santé MGEN ([solidarites-sante.gouv.fr/](http://solidarites-sante.gouv.fr/)), Institut de la Longévité ([www.ilvv.fr](http://www.ilvv.fr)), Conseils Régionaux

382 d'Aquitaine et Bourgogne, Fondation de France ([www.fondationdefrance.org](http://www.fondationdefrance.org)), Ministry of Research-INSERM

383 Programme "Cohortes et collections de données biologiques", Agence Nationale de la Recherche ANR PNRA

384 2006 and LongVie 2007 ([www.anr.fr](http://www.anr.fr)), the "Fondation Plan Alzheimer" (FCS 2009-2012) and the Caisse Nationale

385 de Solidarité pour l'Autonomie (CNSA, [www.cnsa.fr](http://www.cnsa.fr)). Part of this research was also supported by the Fonds de

386 recherche du Québec – Nature et technologies (FRQNT, [www.frqnt.gouv.qc.ca](http://www.frqnt.gouv.qc.ca)), the NSERC Discovery grant

387 ([www.nserc-crsng.gc.ca](http://www.nserc-crsng.gc.ca)), the Université de Sherbrooke institutional chair in neuroinformatics from Pr Descoteaux

388 ([www.usherbrooke.ca](http://www.usherbrooke.ca)) and the Mitacs Accelerate program ([www.mitacs.ca](http://www.mitacs.ca)).

389

### 390 **Compliance with ethical standards**

391 **Conflict of interest** The authors declare that they have no conflict of interest.

392 **Studies involving human participants** All procedures were conducted with approval from the ethics committee

393 of Kremlin Bicêtre Hospital (Paris, France)

394 **Informed consent** All participants provided written informed consent for participation in this study.

395

### 396 **Data availability**

397 The data that support the findings of this study are available from the corresponding author upon reasonable

398 request.

399

### 400 **Author contributions**

401 Conceptualization: ME, GC; Formal analysis: ME; Funding acquisition: BD, CH, JFD, HA, MA, GC;

402 Methodology: ME, GT, BD; Software: GT, FR, MD; Supervision: MD, GC; Visualization: ME, GT; Writing -

403 original draft: ME, GT; Writing - review & editing: all authors review the article. All authors provided critical  
404 feedback and approved the final manuscript.

405

406

## 407 10. References

- 408 1. Damoiseaux JS. Effects of aging on functional and structural brain connectivity. *Neuroimage*. 15 oct  
409 2017;160:32-40.
- 410 2. Ikram MA, Vrooman HA, Vernooij MW, van der Lijn F, Hofman A, van der Lugt A, et al. Brain tissue  
411 volumes in the general elderly population: The Rotterdam Scan Study. *Neurobiology of Aging*. 1 juin  
412 2008;29(6):882-90.
- 413 3. Yang Z, Wen W, Jiang J, Crawford JD, Reppermund S, Levitan C, et al. Age-associated differences on  
414 structural brain MRI in nondemented individuals from 71 to 103 years. *Neurobiology of Aging*. 1 avr  
415 2016;40:86-97.
- 416 4. Sexton CE, Walhovd KB, Storsve AB, Tamnes CK, Westlye LT, Johansen-Berg H, et al. Accelerated  
417 changes in white matter microstructure during aging: a longitudinal diffusion tensor imaging study. *J*  
418 *Neurosci*. 12 nov 2014;34(46):15425-36.
- 419 5. Vernooij MW, Ikram MA, Vrooman HA, Wielopolski PA, Krestin GP, Hofman A, et al. White matter  
420 microstructural integrity and cognitive function in a general elderly population. *Arch Gen Psychiatry*. mai  
421 2009;66(5):545-53.
- 422 6. Madden DJ, Bennett IJ, Burzynska A, Potter GG, Chen N, Song AW. Diffusion tensor imaging of cerebral  
423 white matter integrity in cognitive aging. *Biochimica et Biophysica Acta (BBA) - Molecular Basis of*  
424 *Disease*. 1 mars 2012;1822(3):386-400.
- 425 7. de Groot M, Ikram MA, Akoudad S, Krestin GP, Hofman A, van der Lugt A, et al. Tract-specific white  
426 matter degeneration in aging: the Rotterdam Study. *Alzheimers Dement*. mars 2015;11(3):321-30.
- 427 8. Vinke EJ, de Groot M, Venkatraghavan V, Klein S, Niessen WJ, Ikram MA, et al. Trajectories of imaging  
428 markers in brain aging: the Rotterdam Study. *Neurobiology of Aging*. 1 nov 2018;71:32-40.
- 429 9. Arvanitakis Z, Fleischman DA, Arfanakis K, Leurgans SE, Barnes LL, Bennett DA. Association of white  
430 matter hyperintensities and gray matter volume with cognition in older individuals without cognitive  
431 impairment. *Brain Struct Funct*. 2016;221(4):2135-46.
- 432 10. Bendlin BB, Fitzgerald ME, Ries ML, Xu G, Kastman EK, Thiel BW, et al. White matter in aging and  
433 cognition: a cross-sectional study of microstructure in adults aged eighteen to eighty-three. *Dev*  
434 *Neuropsychol*. 2010;35(3):257-77.
- 435 11. Borghesani PR, Madhyastha TM, Aylward EH, Reiter MA, Swamy BR, Schaie KW, et al. The association  
436 between higher order abilities, processing speed, and age are variably mediated by white matter integrity  
437 during typical aging. *Neuropsychologia*. juill 2013;51(8):1435-44.
- 438 12. Wiseman SJ, Booth T, Ritchie SJ, Cox SR, Muñoz Maniega S, Valdés Hernández MDC, et al. Cognitive  
439 abilities, brain white matter hyperintensity volume, and structural network connectivity in older age. *Hum*  
440 *Brain Mapp*. 2018;39(2):622-32.
- 441 13. Pasternak O, Sochen N, Gur Y, Intrator N, Assaf Y. Free water elimination and mapping from diffusion  
442 MRI. *Magn Reson Med*. sept 2009;62(3):717-30.
- 443 14. Jbabdi S, Johansen-Berg H. Tractography: where do we go from here? *Brain Connect*. 2011;1(3):169-83.
- 444 15. Kurki TJI, Heiskanen LAA. Diffusion parameters of the core of cingulum are associated with age-related  
445 ventricular enlargement: a diffusion tensor tractography study. *Neuroradiology*. 1 oct 2018;60(10):1013-8.

- 446 16. Salminen LE, Conturo TE, Bolzenius JD, Cabeen RP, Akbudak E, Paul RH. REDUCING CSF PARTIAL  
447 VOLUME EFFECTS TO ENHANCE DIFFUSION TENSOR IMAGING METRICS OF BRAIN  
448 MICROSTRUCTURE. *Technol Innov. avr* 2016;18(1):5-20.
- 449 17. Vos SB, Jones DK, Viergever MA, Leemans A. Partial volume effect as a hidden covariate in DTI analyses.  
450 *NeuroImage*. 15 avr 2011;55(4):1566-76.
- 451 18. Metzler-Baddeley C, Jones DK, Steventon J, Westacott L, Aggleton JP, O'Sullivan MJ. Cingulum  
452 Microstructure Predicts Cognitive Control in Older Age and Mild Cognitive Impairment. *J Neurosci*. 5 déc  
453 2012;32(49):17612-9.
- 454 19. Pfefferbaum A, Sullivan EV. Increased brain white matter diffusivity in normal adult aging: Relationship to  
455 anisotropy and partial voluming. *Magnetic Resonance in Medicine*. 2003;49(5):953-61.
- 456 20. Concha L, Gross DW, Beaulieu C. Diffusion Tensor Tractography of the Limbic System. *American Journal*  
457 *of Neuroradiology*. 1 oct 2005;26(9):2267-74.
- 458 21. Jones DK, Cercignani M. Twenty-five pitfalls in the analysis of diffusion MRI data. *NMR Biomed*. août  
459 2010;23(7):803-20.
- 460 22. Seppeband F, Cabeen RP, Choupan J, Barisano G, Law M, Toga AW, et al. Perivascular space fluid  
461 contributes to diffusion tensor imaging changes in white matter. *Neuroimage*. 15 2019;197:243-54.
- 462 23. Albi A, Pasternak O, Minati L, Marizzoni M, Bartrés-Faz D, Bargalló N, et al. Free water elimination  
463 improves test-retest reproducibility of diffusion tensor imaging indices in the brain: A longitudinal multisite  
464 study of healthy elderly subjects. *Hum Brain Mapp*. 2017;38(1):12-26.
- 465 24. Pasternak O, Westin C-F, Bouix S, Seidman LJ, Goldstein JM, Woo T-UW, et al. Excessive extracellular  
466 volume reveals a neurodegenerative pattern in schizophrenia onset. *J Neurosci*. 28 nov  
467 2012;32(48):17365-72.
- 468 25. Bergamino M, Kuplicki R, Victor TA, Cha Y-H, Paulus MP. Comparison of two different analysis  
469 approaches for DTI free-water corrected and uncorrected maps in the study of white matter microstructural  
470 integrity in individuals with depression. *Hum Brain Mapp*. 2017;38(9):4690-702.
- 471 26. Dumont M, Roy M, Jodoin P-M, Morency FC, Houde J-C, Xie Z, et al. Free water in white matter  
472 differentiates MCI and AD from control subjects. *bioRxiv*. 31 janv 2019;537092.
- 473 27. Hoy AR, Ly M, Carlsson CM, Okonkwo OC, Zetterberg H, Blennow K, et al. Microstructural white matter  
474 alterations in preclinical Alzheimer's disease detected using free water elimination diffusion tensor imaging.  
475 *PLoS ONE*. 2017;12(3):e0173982.
- 476 28. Ji F, Pasternak O, Liu S, Loke YM, Choo BL, Hilal S, et al. Distinct white matter microstructural  
477 abnormalities and extracellular water increases relate to cognitive impairment in Alzheimer's disease with  
478 and without cerebrovascular disease. *Alzheimers Res Ther*. 17 août 2017;9(1):63.
- 479 29. Ofori E, Krismer F, Burciu RG, Pasternak O, McCracken JL, Lewis MM, et al. Free water improves  
480 detection of changes in the substantia nigra in parkinsonism: A multisite study. *Mov Disord*. oct  
481 2017;32(10):1457-64.
- 482 30. Tanner JJ, Amin M, Hardcastle C, Parvataneni H, Vaillancourt DE, Mareci TH, et al. Better Brain and  
483 Cognition Prior to Surgery Is Associated With Elevated Postoperative Brain Extracellular Free-Water in  
484 Older Adults. *Front Aging Neurosci* [Internet]. 2019 [cité 29 mai 2019];11. Disponible sur:  
485 [https://www.frontiersin.org/articles/10.3389/fnagi.2019.00117/full?utm\\_source=F-](https://www.frontiersin.org/articles/10.3389/fnagi.2019.00117/full?utm_source=F-AAE&utm_medium=EMLF&utm_campaign=MRK_999212_55_Neuro_20190528_arts_A)  
486 [AAE&utm\\_medium=EMLF&utm\\_campaign=MRK\\_999212\\_55\\_Neuro\\_20190528\\_arts\\_A](https://www.frontiersin.org/articles/10.3389/fnagi.2019.00117/full?utm_source=F-AAE&utm_medium=EMLF&utm_campaign=MRK_999212_55_Neuro_20190528_arts_A)
- 487 31. Aboitiz F, Rodriguez E, Olivares R, Zaidel E. Age-related changes in fibre composition of the human corpus  
488 callosum. *Neuroreport*. 1 juill 1996;7(11):1761-4.
- 489 32. Barkhof F, Fox NC, Bastos-Leite AJ, Scheltens P. Normal Ageing. In: Barkhof F, Fox NC, Bastos-Leite AJ,  
490 Scheltens P, éditeurs. *Neuroimaging in Dementia* [Internet]. Berlin, Heidelberg: Springer Berlin Heidelberg;  
491 2011 [cité 5 oct 2019]. p. 43-57. Disponible sur: [https://doi.org/10.1007/978-3-642-00818-4\\_4](https://doi.org/10.1007/978-3-642-00818-4_4)



- 492 33. Meier-Ruge W, Ulrich J, Brühlmann M, Meier E. Age-related white matter atrophy in the human brain. *Ann*  
493 *N Y Acad Sci.* 26 déc 1992;673:260-9.
- 494 34. Tang Y, Nyengaard JR, Pakkenberg B, Gundersen HJG. Age-Induced White Matter Changes in the Human  
495 Brain: A Stereological Investigation. *Neurobiology of Aging.* 1 nov 1997;18(6):609-15.
- 496 35. Alber J, Alladi S, Bae H-J, Barton DA, Beckett LA, Bell JM, et al. White matter hyperintensities in vascular  
497 contributions to cognitive impairment and dementia (VCID): Knowledge gaps and opportunities.  
498 *Alzheimers Dement (N Y).* 2019;5:107-17.
- 499 36. Duering M, Finsterwalder S, Baykara E, Tuladhar AM, Gesierich B, Konieczny MJ, et al. Free water  
500 determines diffusion alterations and clinical status in cerebral small vessel disease. *Alzheimers Dement.* juin  
501 2018;14(6):764-74.
- 502 37. Maillard P, Mitchell GF, Himali JJ, Beiser A, Fletcher E, Tsao CW, et al. Aortic Stiffness, Increased White  
503 Matter Free Water, and Altered Microstructural Integrity: A Continuum of Injury. *Stroke.*  
504 2017;48(6):1567-73.
- 505 38. Maillard P, Fletcher E, Singh B, Martinez O, Johnson DK, Olichney JM, et al. Cerebral white matter free  
506 water: A sensitive biomarker of cognition and function. *Neurology.* 7 mai 2019;92(19):e2221-31.
- 507 39. Habes M, Erus G, Toledo JB, Zhang T, Bryan N, Launer LJ, et al. White matter hyperintensities and imaging  
508 patterns of brain ageing in the general population. *Brain.* avr 2016;139(4):1164-79.
- 509 40. Leeuw F-E de, Groot JC de, Achten E, Oudkerk M, Ramos LMP, Heijboer R, et al. Prevalence of cerebral  
510 white matter lesions in elderly people: a population based magnetic resonance imaging study. The Rotterdam  
511 Scan Study. *Journal of Neurology, Neurosurgery & Psychiatry.* 1 janv 2001;70(1):9-14.
- 512 41. Maillard P, Fletcher E, Lockhart SN, Roach AE, Reed B, Mungas D, et al. White Matter Hyperintensities  
513 and their Penumbra Lie Along a Continuum of Injury In The Aging Brain. *Stroke.* juin 2014;45(6):1721-6.
- 514 42. Maniega SM, Valdés Hernández MC, Clayden JD, Royle NA, Murray C, Morris Z, et al. White matter  
515 hyperintensities and normal-appearing white matter integrity in the aging brain. *Neurobiol Aging.* févr  
516 2015;36(2):909-18.
- 517 43. Pelletier A, Periot O, Dilharreguy B, Hiba B, Bordessoules M, Chanraud S, et al. Age-Related Modifications  
518 of Diffusion Tensor Imaging Parameters and White Matter Hyperintensities as Inter-Dependent Processes.  
519 *Front Aging Neurosci.* 2015;7:255.
- 520 44. Reginold W, Sam K, Poublanc J, Fisher J, Crawley A, Mikulis DJ. Impact of white matter hyperintensities  
521 on surrounding white matter tracts. *Neuroradiology.* sept 2018;60(9):933-44.
- 522 45. Reginold W, Itorralba J, Luedke AC, Fernandez-Ruiz J, Reginold J, Islam O, et al. Tractography at 3T MRI  
523 of Corpus Callosum Tracts Crossing White Matter Hyperintensities. *American Journal of Neuroradiology.*  
524 1 sept 2016;37(9):1617-22.
- 525 46. Svärd D, Nilsson M, Lampinen B, Lätt J, Sundgren PC, Stomrud E, et al. The effect of white matter  
526 hyperintensities on statistical analysis of diffusion tensor imaging in cognitively healthy elderly and  
527 prodromal Alzheimer's disease. *PLOS ONE.* 21 sept 2017;12(9):e0185239.
- 528 47. Rizvi B, Lao PJ, Colón J, Hale C, Igwe KC, Narkhede A, et al. Tract-defined regional white matter  
529 hyperintensities and memory. *NeuroImage: Clinical.* 1 janv 2020;25:102143.
- 530 48. Jones DK, Christiansen KF, Chapman RJ, Aggleton JP. Distinct subdivisions of the cingulum bundle  
531 revealed by diffusion MRI fibre tracking: Implications for neuropsychological investigations.  
532 *Neuropsychologia.* janv 2013;51(1):67.
- 533 49. Amieva H, Le Goff M, Millet X, Orgogozo JM, Pérès K, Barberger-Gateau P, et al. Prodromal Alzheimer's  
534 disease: successive emergence of the clinical symptoms. *Ann Neurol.* nov 2008;64(5):492-8.
- 535 50. Catheline G, Periot O, Amirault M, Braun M, Dartigues J-F, Auriacombe S, et al. Distinctive alterations of  
536 the cingulum bundle during aging and Alzheimer's disease. *Neurobiology of Aging.* 1 sept  
537 2010;31(9):1582-92.

- 538 51. Ezzati A, Katz MJ, Lipton ML, Zimmerman ME, Lipton RB. Hippocampal volume and cingulum bundle  
539 fractional anisotropy are independently associated with verbal memory in older adults. *Brain Imaging*  
540 *Behav.* sept 2016;10(3):652-9.
- 541 52. Kantarci K, Senjem ML, Avula R, Zhang B, Samikoglu AR, Weigand SD, et al. Diffusion tensor imaging  
542 and cognitive function in older adults with no dementia. *Neurology.* 5 juill 2011;77(1):26-34.
- 543 53. Seiler S, Fletcher E, Hassan-Ali K, Weinstein M, Beiser A, Himali JJ, et al. Cerebral tract integrity relates  
544 to white matter hyperintensities, cortex volume, and cognition. *Neurobiology of Aging.* 1 déc  
545 2018;72:14-22.
- 546 54. Sexton CE, Mackay CE, Lonie JA, Bastin ME, Terrière E, O'Carroll RE, et al. MRI correlates of episodic  
547 memory in Alzheimer's disease, mild cognitive impairment, and healthy aging. *Psychiatry Res.* 30 oct  
548 2010;184(1):57-62.
- 549 55. 3C Study Group. Vascular factors and risk of dementia: design of the Three-City Study and baseline  
550 characteristics of the study population. *Neuroepidemiology.* déc 2003;22(6):316-25.
- 551 56. Isaacs B, Kennie AT. The Set test as an aid to the detection of dementia in old people. *Br J Psychiatry.* oct  
552 1973;123(575):467-70.
- 553 57. Radloff LS. The CES-D Scale: A Self-Report Depression Scale for Research in the General Population.  
554 *Applied Psychological Measurement.* 1 juin 1977;1(3):385-401.
- 555 58. Behrens TEJ, Berg HJ, Jbabdi S, Rushworth MFS, Woolrich MW. Probabilistic diffusion tractography with  
556 multiple fibre orientations: What can we gain? *Neuroimage.* 1 janv 2007;34(1):144-55.
- 557 59. Behrens TEJ, Woolrich MW, Jenkinson M, Johansen-Berg H, Nunes RG, Clare S, et al. Characterization  
558 and propagation of uncertainty in diffusion-weighted MR imaging. *Magn Reson Med.* nov  
559 2003;50(5):1077-88.
- 560 60. Smith SM. Fast robust automated brain extraction. *Hum Brain Mapp.* nov 2002;17(3):143-55.
- 561 61. Descoteaux M, Wiest-Daesslé N, Prima S, Barillot C, Deriche R. Impact of Rician adapted Non-Local  
562 Means filtering on HARDI. *Med Image Comput Comput Assist Interv.* 2008;11(Pt 2):122-30.
- 563 62. Descoteaux M, Angelino E, Fitzgibbons S, Deriche R. Regularized, fast, and robust analytical Q-ball  
564 imaging. *Magn Reson Med.* sept 2007;58(3):497-510.
- 565 63. Tournier J-D, Calamante F, Connelly A. Robust determination of the fibre orientation distribution in  
566 diffusion MRI: Non-negativity constrained super-resolved spherical deconvolution. *NeuroImage.* 1 mai  
567 2007;35(4):1459-72.
- 568 64. Theaud G, Houde J-C, Boré A, Rheault F, Morency F, Descoteaux M. TractoFlow: A robust, efficient and  
569 reproducible diffusion MRI pipeline leveraging Nextflow & Singularity. *bioRxiv.* 9 mai 2019;631952.
- 570 65. Schmidt P, Gaser C, Arsic M, Buck D, Förchler A, Berthele A, et al. An automated tool for detection of  
571 FLAIR-hyperintense white-matter lesions in Multiple Sclerosis. *NeuroImage.* 15 févr 2012;59(4):3774-83.
- 572 66. Garyfallidis E, Côté M-A, Rheault F, Sidhu J, Hau J, Petit L, et al. Recognition of white matter bundles  
573 using local and global streamline-based registration and clustering. *NeuroImage.* 15 avr 2018;170:283-95.
- 574 67. Benjamini Y, Hochberg Y. Controlling the False Discovery Rate: A Practical and Powerful Approach to  
575 Multiple Testing. *Journal of the Royal Statistical Society: Series B (Methodological).* 1995;57(1):289-300.
- 576 68. Bergamino M, Pasternak O, Farmer M, Shenton ME, Paul Hamilton J. Applying a free-water correction to  
577 diffusion imaging data uncovers stress-related neural pathology in depression. *NeuroImage: Clinical.* 1 janv  
578 2016;10:336-42.
- 579 69. Hoy AR, Kecskemeti SR, Alexander AL. Free water elimination diffusion tractography: A comparison with  
580 conventional and fluid-attenuated inversion recovery, diffusion tensor imaging acquisitions. *Journal of*  
581 *Magnetic Resonance Imaging.* 2015;42(6):1572-81.

- 582 70. Bennett IJ, Madden DJ. Disconnected aging: Cerebral white matter integrity and age-related differences in  
583 cognition. *Neuroscience*. 12 sept 2014;276:187-205.
- 584 71. Bennett IJ, Greenia DE, Maillard P, Sajjadi SA, DeCarli C, Corrada MM, et al. Age-related white matter  
585 integrity differences in oldest-old without dementia. *Neurobiology of Aging*. 1 août 2017;56:108-14.
- 586 72. Lockhart SN, DeCarli C. Structural imaging measures of brain aging. *Neuropsychol Rev*. sept  
587 2014;24(3):271-89.
- 588 73. Bettcher BM, Mungas D, Patel N, Eloffson J, Dutt S, Wynn M, et al. Neuroanatomical substrates of executive  
589 functions: Beyond prefrontal structures. *Neuropsychologia*. 1 mai 2016;85:100-9.
- 590 74. Charlton RA, Barrick TR, Lawes INC, Markus HS, Morris RG. White matter pathways associated with  
591 working memory in normal aging. *Cortex*. 1 avr 2010;46(4):474-89.
- 592 75. Chiang H-L, Chen Y-J, Shang C-Y, Tseng W-YI, Gau SS-F. Different neural substrates for executive  
593 functions in youths with ADHD: a diffusion spectrum imaging tractography study. *Psychological Medicine*.  
594 avr 2016;46(6):1225-38.
- 595 76. Sasson E, Doniger GM, Pasternak O, Tarrasch R, Assaf Y. White matter correlates of cognitive domains in  
596 normal aging with diffusion tensor imaging. *Front Neurosci [Internet]*. 2013 [cité 7 nov 2018];7. Disponible  
597 sur: <https://www.frontiersin.org/articles/10.3389/fnins.2013.00032/full>
- 598 77. Lyall AE, Pasternak O, Robinson DG, Newell D, Trampush JW, Gallego JA, et al. Greater Extracellular  
599 Free Water in First-Episode Psychosis Predicts Better Neurocognitive Functioning. *Mol Psychiatry*. mars  
600 2018;23(3):701-7.
- 601 78. Ji F, Pasternak O, Ng KK, Chong JSX, Liu S, Zhang L, et al. White matter microstructural abnormalities  
602 and default network degeneration are associated with early memory deficit in Alzheimer's disease  
603 continuum. *Sci Rep*. 18 mars 2019;9(1):4749.
- 604 79. Chad JA, Pasternak O, Salat DH, Chen JJ. Re-examining age-related differences in white matter  
605 microstructure with free-water corrected diffusion tensor imaging. *Neurobiol Aging*. nov 2018;71:161-70.
- 606 80. Rydhög AS, Szczepankiewicz F, Wirestam R, Ahlgren A, Westin C-F, Knutsson L, et al. Separating blood  
607 and water: Perfusion and free water elimination from diffusion MRI in the human brain. *Neuroimage*. 01  
608 2017;156:423-34.
- 609 81. Lange RT, Shewchuk JR, Heran MKS, Rauscher A, Jarrett M, Brubacher JR, et al. To exclude or not to  
610 exclude: further examination of the influence of white matter hyperintensities in diffusion tensor imaging  
611 research. *J Neurotrauma*. 15 janv 2014;31(2):198-205.
- 612 82. Leritz EC, Shepel J, Williams VJ, Lipsitz LA, McGlinchey RE, Milberg WP, et al. Associations between  
613 T1 white matter lesion volume and regional white matter microstructure in aging. *Hum Brain Mapp*. mars  
614 2014;35(3):1085-100.
- 615 83. Promjunyakul N-O, Lahna DL, Kaye JA, Dodge HH, Erten-Lyons D, Rooney WD, et al. Comparison of  
616 cerebral blood flow and structural penumbras in relation to white matter hyperintensities: A multi-modal  
617 magnetic resonance imaging study. *J Cereb Blood Flow Metab*. 2016;36(9):1528-36.
- 618 84. Bubb EJ, Metzler-Baddeley C, Aggleton JP. The cingulum bundle: Anatomy, function, and dysfunction.  
619 *Neurosci Biobehav Rev*. 10 mai 2018;
- 620 85. Catani M, Thiebaut de Schotten M. A diffusion tensor imaging tractography atlas for virtual in vivo  
621 dissections. *Cortex*. sept 2008;44(8):1105-32.
- 622 86. Lawes INC, Barrick TR, Murugam V, Spierings N, Evans DR, Song M, et al. Atlas-based segmentation of  
623 white matter tracts of the human brain using diffusion tensor tractography and comparison with classical  
624 dissection. *Neuroimage*. 1 janv 2008;39(1):62-79.
- 625 87. Pasternak O, Shenton ME, Westin C-F. Estimation of extracellular volume from regularized multi-shell  
626 diffusion MRI. *Med Image Comput Comput Assist Interv*. 2012;15(Pt 2):305-12.

### 13. Figures

Figure 1

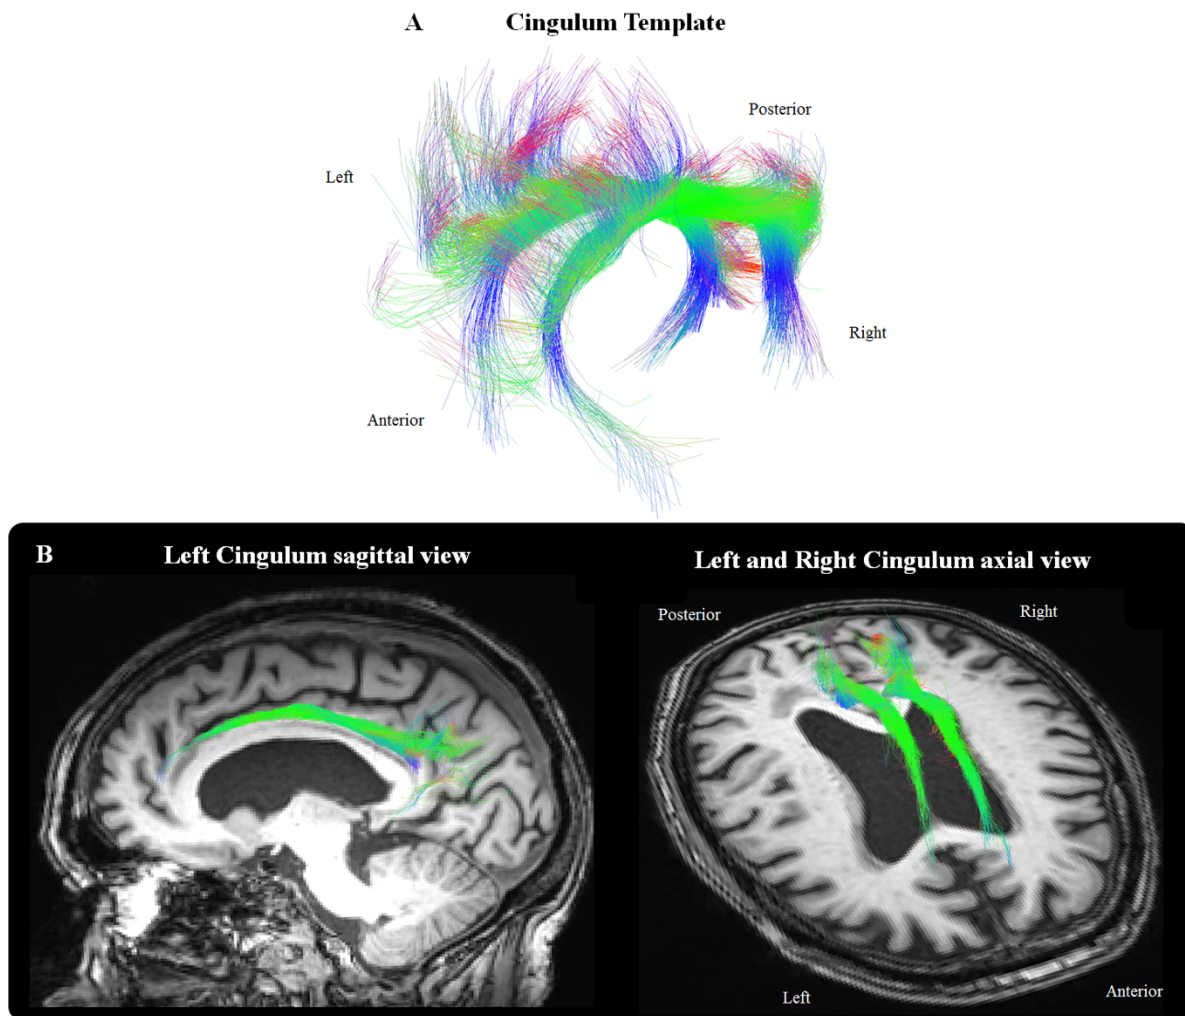

Figure 2

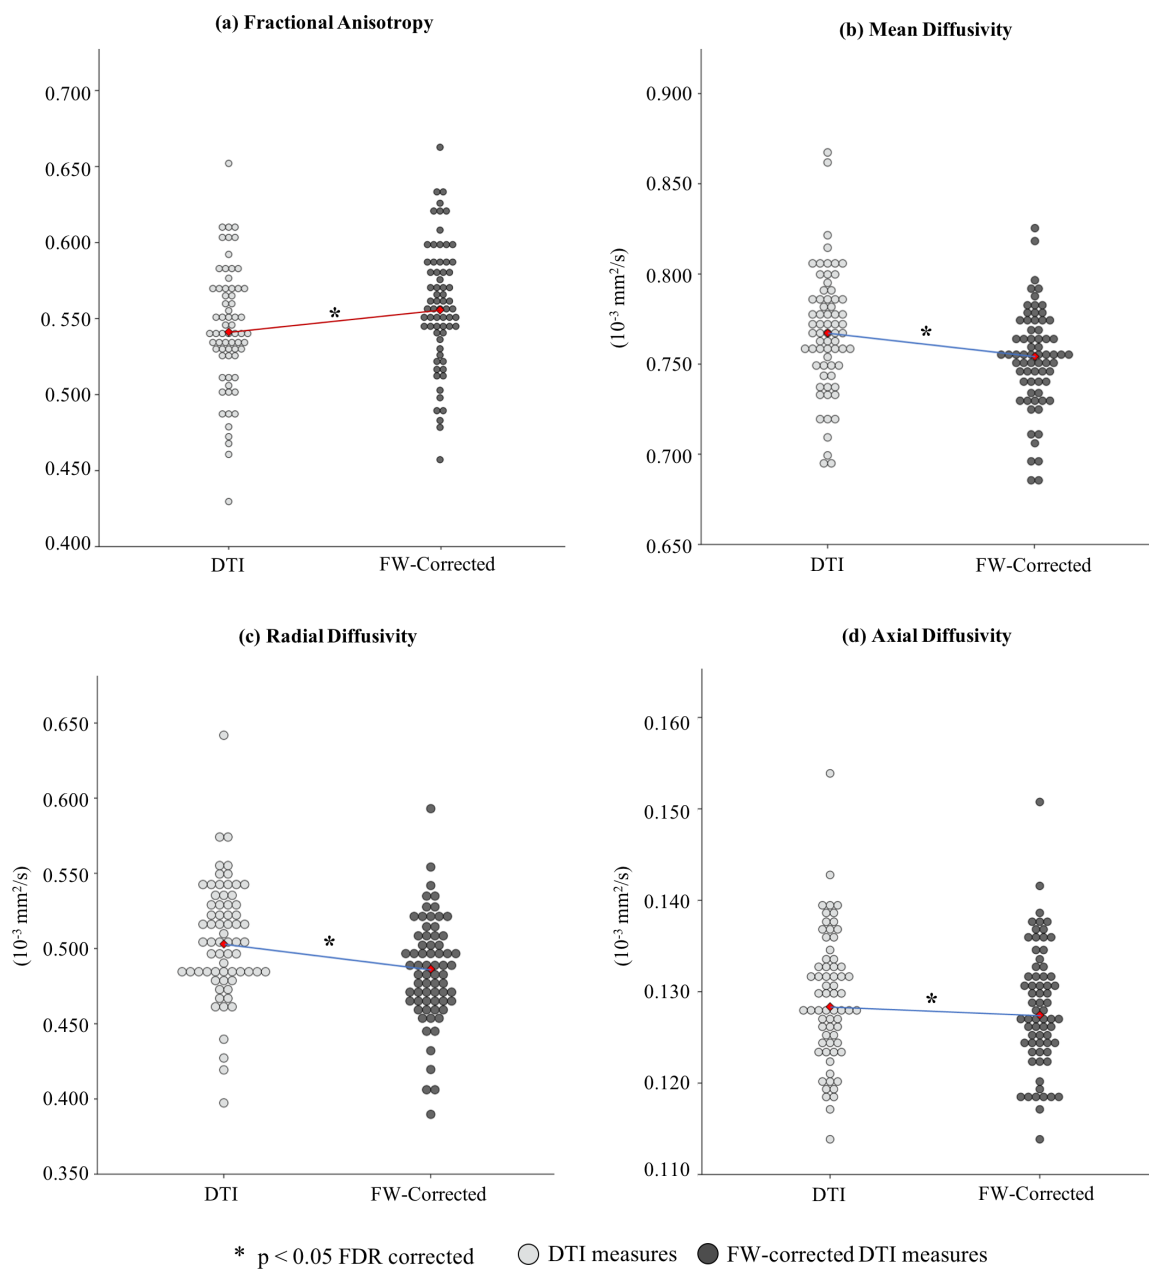

Source: https://www.biorxiv.org/content/10.1101/867606v2.full.pdf
